# Supplementary material for: Identification of Beneficial Microbial Consortia and Bioactive Compounds with Potential as Plant Biostimulants for a Sustainable Agriculture
Source: MDPI journal article supplement (doi:10.3390/microorganisms9020426), 2021-02-19
Supplement: s1 [file s1]

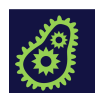

## Supplementary

# Identification of Beneficial Microbial Consortia and Bioactive Compounds with Potential as Plant Biostimulants for a Sustainable Agriculture

Silvia Tabacchioni <sup>1†</sup>, Stefania Passato <sup>2</sup>, Patrizia Ambrosino <sup>2</sup>, Liren Huang <sup>3</sup>, Marina Caldara <sup>4</sup>, Cristina Cantale <sup>1†</sup>, Jonas Hett <sup>5</sup>, Antonella Del Fiore <sup>1</sup>, Alessia Fiore <sup>1</sup>, Andreas Schlüter <sup>3</sup>, Alexander Sczyrba <sup>3</sup>, Elena Maestri <sup>4</sup>, Nelson Marmiroli <sup>4</sup>, Daniel Neuhoﬀ <sup>5</sup>, Joseph Nesme <sup>6</sup>, Søren Johannes Sørensen <sup>6</sup>, Giuseppe Aprea <sup>1</sup>, Chiara Nobili <sup>1</sup>, Ombretta Presenti <sup>1</sup>, Giusto Giovannetti <sup>7</sup>, Caterina Giovannetti <sup>7</sup>, Anne Pihlanto <sup>8</sup>, Andrea Brunori <sup>1</sup> and Annamaria Bevivino <sup>1,\*</sup>

<sup>1</sup> Department of Sustainability, Italian National Agency for New Technologies, Energy and Sustainable Economic Development, ENEA Casaccia Research Center, 00123 Rome, Italy; silvia.tabacchioni@enea.it (S.T.); cristina.cantale@enea.it (C.C.); antonella.delfiore@enea.it (A.D.F.); alessia.fiore@enea.it (A.F.); giuseppe.aprea@enea.it (G.A.); chiara.nobili@enea.it (C.N.); ombretta.presenti@enea.it (O.P.); andrea.brunori@enea.it (A.B.); annamaria.bevivino@enea.it (A.B.)

<sup>2</sup> AGRIGES srl, 82035 San Salvatore Telesino (BN), Italy; stefania.passato@agriges.com (S.P.); patrizia.ambrosino@agriges.com (P.A.)

<sup>3</sup> Center for Biotechnology (CeBiTec), Institute of Crop Science and Resource Conservation, Bielefeld University, 33615 Bielefeld, Germany; huanglr@cebitec.uni-bielefeld.de (L.H.); aschluet@cebitec.uni-bielefeld.de (A.S.); aschluet@cebitec.uni-bielefeld.de (A.S.)

<sup>4</sup> SITEIA.PARMA, Interdepartmental Centre for Food Safety, Technologies and Innovation for Agri-food and Department of Chemistry, Life Sciences and Environmental Sustainability, 43124 University of Parma, Italy; marina.caldara@unipr.it (M.C.); elena.maestri@unipr.it (E.M.); nelson.marmiroli@unipr.it (N.M.)

<sup>5</sup> Department of Agroecology & Organic Farming Rheinische Friedrich-Wilhelms-Universität Bonn, 53121 Bonn, Germany; jhett@uni-bonn.de (J.H.); d.neuhoﬀ@uni-bonn.de (D.N.)

<sup>6</sup> Department of Biology, University of Copenhagen, Universitetsparken 15 Bldg 1, 2200 Copenhagen, Denmark; joseph.nesme@bio.ku.dk (J.N.); sjs@bio.ku.dk (S.J.S.)

<sup>7</sup> Centro Colture Sperimentali, CCS-Aosta S.r.l., 11020 Quart (AO), Italy; giustogiovannetti@hotmail.com (G.G.); caterina@micosat.it (C.G.)

<sup>8</sup> Natural Resources Institute Finland (Luke), Myllytie 1, 31600 Jokioinen, Helsinki, Finland; anne.pihlanto@luke.fi (A.P.)

\* Correspondence: annamaria.bevivino@enea.it

† These authors contributed equally to this work.

**Citation:** Tabacchioni, S.; Passato, S.; Ambrosino, P.; Huang, L.; Caldara, M.; Cantale, C.; Hett, J.; Del Fiore, A.; Fiore, A.; Schlüter, A.; et al. Identification of Beneficial Microbial Consortia and Bioactive Compounds with Potential as Plant Biostimulants for a Sustainable Agriculture. *Microorganisms* **2021**, *9*, x. <https://doi.org/10.3390/xxxxx>

Academic Editor: Denis Faure

Received: 01 January 2021

Accepted: 08 February 2021

Published: date

**Publisher's Note:** MDPI stays neutral with regard to jurisdictional claims in published maps and institutional affiliations.

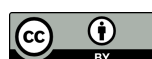

**Copyright:** © 2021 by the authors.

Submitted for possible open access

publication under the terms and

conditions of the Creative Commons

Attribution (CC BY) license

(<http://creativecommons.org/licenses/by/4.0/>).

**Figure S1.** Genome coverage comparison after peak removal. A), Reads coverage of the *Burkholderia ambifaria* MC40-6 strain genome sequence is presented by the mean coverage of a 1000-nucleotides window. Red arrows point out highly covered peak regions of 16S genes. After peak removal process, the highly covered regions are no longer present in B). Both A) and B) are plotted using the fragment recruitment results of the same *B. ambifaria* MC40-6 strain and the sequencing data from NCBI with accession ID: SRR5487771

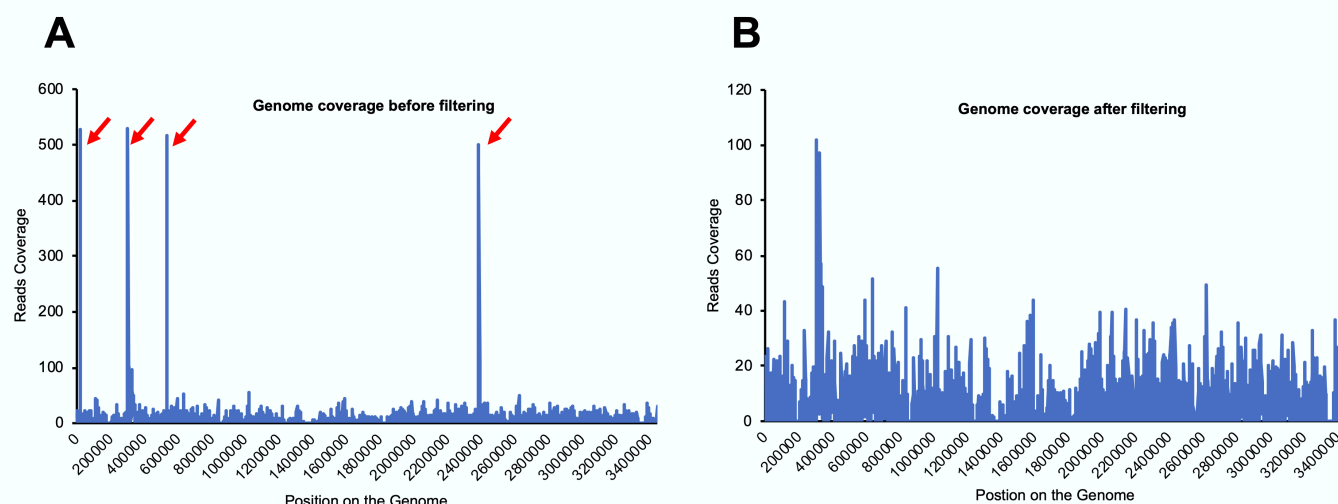

**Data Sheet S1.** Data collected from articles retrieved via systematic literature survey. To proceed with the preliminary screening of publications, privileging those presenting more consistent, significant and representative data, scientific articles received an individual score made up by the sum of marks assigned for each of the following six indicators, with possible alternatives and relative marks shown in parentheses: i) Experimental environment (growth-chamber=0, greenhouse=1 field=2); ii) PGPMs ease and readiness of acquisition (patent=0, research institute=1, commercial= 2); iii) Experimental design-number of treatment combinations (up to 5=1, 6 to 10=2, 11 to 15=3, over 15=4); iv) Experimental design-number of measured parameters (up to 5=1, 6 to 10=2, 11 to 15=3, over 15=4); v) PGPMs characterisation at molecular level (no=0, yes=1); vi) Overall evaluation of PGPMs effectiveness (low=0, moderate=3, high=6, plus one additional extra point in all cases if the experiment was carried out without the employment of chemical inputs). Rows highlighted in grey and in white refer respectively to articles whose total mark resulted below or above the discriminative threshold adopted, set at 10 points. Only the latter group of publications (73 out of 134) was considered in the subsequent steps of PGPMs selection.

**Table S1.** The genomes of the selected PGP strains isolated from rhizosphere.

**Table S2.** The genomes of the selected PGPM isolated from soil samples.

**Table S3.** The genomes of the selected PGPM isolated from root samples.

**Table S4.** Database summary as related to the number of eligible articles, studies, PGPMs and consortia examined in the present study.

| Crop | Eligible articles <sup>a</sup> | Field studies | Studies without stresses | Studies on abiotic stress | Studies on biotic stress | PGPMs | Consortia |
|------|--------------------------------|---------------|--------------------------|---------------------------|--------------------------|-------|-----------|
|------|--------------------------------|---------------|--------------------------|---------------------------|--------------------------|-------|-----------|

|        |         |    |    |                                |                                                         |    |    |
|--------|---------|----|----|--------------------------------|---------------------------------------------------------|----|----|
| TOMATO | 41 (12) | 15 | 15 | 6 - salt                       | 1 - <i>Botrytis cinerea</i>                             | 41 | 11 |
|        |         |    |    | 1 - salt+drought               | 6 - <i>Fusarium oxysporum</i> f. sp. <i>lycopersici</i> |    |    |
| MAIZE  | 43 (31) | 22 | 28 | 2 - drought                    | 1 - <i>Fusarium solani</i>                              | 48 | 11 |
|        |         |    |    | 1 - cold                       | 1 - <i>Helicoverpa armigera</i>                         |    |    |
| POTATO | 16 (9)  | 9  | 9  | 1 - flooding                   | 4 - <i>Meloidogyne incognita</i>                        | 24 | 2  |
|        |         |    |    |                                | 1 - <i>Phytophthora infestans</i>                       |    |    |
| WHEAT  | 34 (21) | 10 | 20 |                                | 3 - <i>Ralstonia solanacearum</i>                       | 61 | 16 |
|        |         |    |    |                                | 2 - <i>Rhizoctonia solani</i>                           |    |    |
|        |         |    |    |                                | 1 - <i>Sclerotinia minor</i>                            |    |    |
|        |         |    |    |                                | 1 - <i>Sclerotinia sclerotiorum</i>                     |    |    |
|        |         |    |    |                                | 1 - <i>Verticillium dahliae</i>                         |    |    |
|        |         |    |    |                                |                                                         |    |    |
|        |         |    |    | 5 - salt                       | 1 - <i>Fusarium oxysporum</i>                           | 48 | 11 |
|        |         |    |    | 1 - salt+drought               | 1 - <i>Fusarium moliniforme</i>                         |    |    |
|        |         |    |    | 7 - drought                    |                                                         |    |    |
|        |         |    |    |                                |                                                         |    |    |
|        |         |    |    | 1 - drought                    | 1 - <i>Ralstonia solanacearum</i>                       | 24 | 2  |
|        |         |    |    | 1 - drought+salt+ heavy metals | 2 - <i>Rhizoctonia solani</i>                           |    |    |
|        |         |    |    | 1- heat                        | 1 - <i>Streptomyces bottopenensis</i>                   |    |    |
|        |         |    |    |                                | 1 - <i>Streptomyces scabies</i>                         |    |    |
|        |         |    |    |                                | 1 - <i>Aspergillus niger</i>                            |    |    |
|        |         |    |    |                                | 3 - <i>Fusarium graminearum</i>                         |    |    |
|        |         |    |    |                                | 3 - <i>Gaeumannomyces graminis</i> var. <i>tritici</i>  |    |    |
|        |         |    |    |                                | 1 - <i>Heterodera avenae</i>                            |    |    |
|        |         |    |    | 9 - salt                       | 1 - <i>Macrophomina phaseolina</i>                      | 61 | 16 |
|        |         |    |    | 3 - drought                    | 1 - <i>Microsporium gypseum</i>                         |    |    |
|        |         |    |    | 1 - heavy metals               | 1 - <i>Penicillium chrysogenum</i>                      |    |    |
|        |         |    |    | 1 - temperature                | 2 - <i>Pythium</i> sp.                                  |    |    |
|        |         |    |    |                                | 2 - <i>Pythium ultimum</i>                              |    |    |
|        |         |    |    |                                | 1 - <i>Rhizoctonia solani</i>                           |    |    |

<sup>a</sup> In parentheses, the number of articles that reached the minimum rank value (>10).

**Table S5.** PGPMs and commercial biofertilizers derived from the eligible studies on tomato, maize, potato and wheat.

| CROP   | PGPMs                                                                                                                                                                                                                                                                                                                                                                                                                                                                                                                                                 | COMMERCIAL BIOFERTILIZER<br>(Country-Company/Species/Effect)                                                                                                                                                                                                                                                                                                                               |
|--------|-------------------------------------------------------------------------------------------------------------------------------------------------------------------------------------------------------------------------------------------------------------------------------------------------------------------------------------------------------------------------------------------------------------------------------------------------------------------------------------------------------------------------------------------------------|--------------------------------------------------------------------------------------------------------------------------------------------------------------------------------------------------------------------------------------------------------------------------------------------------------------------------------------------------------------------------------------------|
| TOMATO | <i>Achromobacter piechaudii</i> , <i>Alcaligenes</i> sp., Arbuscular mycorrhizal fungi (AMF), <i>Azotobacter chroococcum</i> , <i>Bacillus</i> sp., <i>Bacillus amylo-liquefaciens</i> , <i>Bacillus cereus</i> , <i>Bacillus chitinosporns</i> , <i>Bacillus laterosporus</i> , <i>Bacillus licheniformis</i> , <i>Bacillus megaterium</i> , <i>Bacillus methylotrophicus</i> , <i>Bacillus pumilus</i> , <i>Bacillus simplex</i> , <i>Bacillus subtilis</i> , <i>Beauveria bassiana</i> , <i>Chryseobacterium</i> sp., <i>Citrobacter youngae</i> , | BioF (Bangladesh-Natore Develop Soc/ <i>Trichoderma hartianum</i> T22/PGP)<br>BioRex 1 (Hungary-BioRex/ <i>Bacillus subtilis</i> + <i>Bacillus thuringiensis</i> + <i>Bacillus megaterium</i> /PGP)<br>BioRex 2 (Hungary-BioRex/ <i>Azotobacter chroococcum</i> + <i>Azospirillum lipoferum</i> + <i>Pseudomonas putida</i> /PGP)<br>Biostart® 2000 (South Africa-Microbial Solutions Ltd/ |

|       |                                                                                                                                                                                                                                                                                                                                                                                                                                                                                                                                                                                                                                                                                                                                                                                                                                                                                                                                                                                                                                                                  |                                                                                                                                                                                                                                                                                                                                                                                                                                                                                                                                                                                                                                                                                                                                                                                                                                                                                                                                                                                                                                                      |
|-------|------------------------------------------------------------------------------------------------------------------------------------------------------------------------------------------------------------------------------------------------------------------------------------------------------------------------------------------------------------------------------------------------------------------------------------------------------------------------------------------------------------------------------------------------------------------------------------------------------------------------------------------------------------------------------------------------------------------------------------------------------------------------------------------------------------------------------------------------------------------------------------------------------------------------------------------------------------------------------------------------------------------------------------------------------------------|------------------------------------------------------------------------------------------------------------------------------------------------------------------------------------------------------------------------------------------------------------------------------------------------------------------------------------------------------------------------------------------------------------------------------------------------------------------------------------------------------------------------------------------------------------------------------------------------------------------------------------------------------------------------------------------------------------------------------------------------------------------------------------------------------------------------------------------------------------------------------------------------------------------------------------------------------------------------------------------------------------------------------------------------------|
|       | <p>Combifector B formulation (<i>Trichoderma harzianum</i> OMG16 and <i>Bacillus amyloliquefaciens</i> FZB42, enriched with zinc and manganese), <i>Enterobacter</i> sp., <i>Enterobacter cloacae</i>, <i>Flavobacterium glaciei</i>, <i>Klebsiella</i> sp., <i>Klebsiella pneumoniae</i>, <i>Lactobacillus paracasei</i>, <i>Paenibacillus polymyxa</i>, <i>Pleosporales</i> (suborder Massarineae), <i>Pseudomonas</i> sp., <i>Pseudomonas aeruginosa</i>, <i>Pseudomonas brassicacearum</i>, <i>Pseudomonas chlororaphis</i>, <i>Pseudomonas frederiksbergensis</i>, <i>Pseudomonas fluorescens</i>, <i>Pseudomonas migulae</i>, <i>Pseudomonas protegens</i>, <i>Pseudomonas putida</i>, <i>Pseudomonas stutzeri</i>, <i>Pseudomonas vancouverensis</i>, <i>Rhizophagus intraradices</i>, <i>Serratia marcescens</i>, <i>Streptomyces</i> sp., <i>Streptomyces rubrogriseus</i>, <i>Trichoderma</i> sp., <i>Trichoderma harzianum</i></p>                                                                                                                    | <p><i>Bacillus chitosporus</i>+<i>Bacillus laterosporus</i>+<i>Bacillus licheniformis</i>/PGP)<br/> NemOut® (Brazil/<i>Bacillus licheniformis</i>+<i>Bacillus subtilis</i>+<i>Trichoderma longibrachiatum</i>/biocontrol)<br/> Paecilomyces JCO® (Brazil/<i>Purpureocillium lilacinus</i>/biocontrol)<br/> Rizotec (Brazil/<i>Poconia chlamydosporia</i>/biocontrol)<br/> Serenade® SC (Germany-Bayer/<i>Bacillus subtilis</i>/ biocontrol)<br/> Nemat® WP (Brazil/<i>Purpureocillium lilacinus</i>/biocontrol)<br/> Pochar™ (Italy/Microspore/<i>Arthrobotis oligospora</i> +<i>Glomus</i> sp.+<i>Bacillus</i> spp./biocontrol)<br/> Polygardon (Slovakia-Polyversum/<i>Phythium oligandrum</i>/biocontrol)<br/> Phylazonit MC® (Hungary/<i>Pseudomonas putida</i>+ <i>Azotobacter chroococcum</i>+<i>Bacillus circulans</i>+<i>Bacillus megaterium</i>/PGP under water stress);<br/> FZB24®WG (Germany-ABiTEP/<i>Bacillus amyloliquefaciens</i> FZB24/PGP)<br/> Rhizovital FZB42® (Germany-ABiTEP/<i>Bacillus amyloliquefaciens</i> FZB42/PGP)</p> |
| MAIZE | <p><i>Acinetobacter</i> sp., <i>Achromobacter</i> sp., <i>Azospirillum</i> sp., <i>Azospirillum brasilense</i>, <i>Azospirillum lipoferum</i>, <i>Azotobacter</i> sp., <i>Azotobacter chroococcum</i>, <i>Bacillus</i> sp., <i>Bacillus amyloliquefaciens</i>, <i>Bacillus cereus</i>, <i>Bacillus lentus</i>, <i>Bacillus megaterium</i>, <i>Bacillus pumilus</i>, <i>Bacillus subtilis</i>, <i>Burkholderia</i> sp., <i>Burkholderia ambifaria</i>, <i>Burkholderia phytofirmans</i>, <i>Chryseobacterium humi</i>, <i>Chryseobacterium palustre</i>, <i>Glomus intraradices</i>, <i>Enterobacter</i> sp., <i>Enterobacter aerogenes</i>, <i>Enterobacter radicincitans</i>, <i>Meyerozyma guilliermondii</i>, <i>Mitsuaria</i> sp., <i>Mycobacterium phlei</i>, <i>Paenibacillus polymyxa</i>, <i>Proteus</i> sp., <i>Pseudomonas</i> sp., <i>Pseudomonas aeruginosa</i>, <i>Pseudomonas alcaligenes</i>, <i>Pseudomonas aurantiaca</i>, <i>Pseudomonas entomophila</i>, <i>Pseudomonas fluorescens</i>, <i>Pseudomonas monteilli</i>, <i>Pseudomonas</i></p> | <p>Trianum® (Netherlands- Koppert B.V./<i>Trichoderma harzianum</i>T-22/PGP)<br/> Proradix® (Germany- Sourcon-Padena GmbH /<i>Pseudomonas</i> sp.DSMZ 13134/ PGP)<br/> Rhizovital FZB42® (Germany-ABiTEP gmbH/<i>Bacillus amyloliquefaciens</i>/PGPR)<br/> AM fungal inoculum (Italy-Mybasol srl/<i>Rhizophagus intraradices</i>+<i>Glomus aggregatum</i>+<i>Glomus viscosum</i>+<i>Claroideoglomus etunicatum</i>+<i>Claroideoglomus claroideum</i>/PGP)<br/> Rhizoflo Premium Maiz® (Argentina/<i>Azospirillum brasilense</i> + <i>Pseudomonas fluorescens</i>/PGP)<br/> <i>Azospirillum lipoferum</i> CRT1 (France-Lesaffre Agrauxine/<i>Azospirillum lipoferum</i> CRT1/PGP)</p>                                                                                                                                                                                                                                                                                                                                                                 |

|        |                                                                                                                                                                                                                                                                                                                                                                                                                                                                                                                                                                                                                                                                                                                                                                                                                                                                                                                                                                                                                                                                                                                                                                                                                                                                                                                                                                                                                                                                                                                                                          |                                                                                                                                                                                                                                                                                                                                                                                                                                                                                                                                                                                                                                                                                                                                                                                                                                                                        |
|--------|----------------------------------------------------------------------------------------------------------------------------------------------------------------------------------------------------------------------------------------------------------------------------------------------------------------------------------------------------------------------------------------------------------------------------------------------------------------------------------------------------------------------------------------------------------------------------------------------------------------------------------------------------------------------------------------------------------------------------------------------------------------------------------------------------------------------------------------------------------------------------------------------------------------------------------------------------------------------------------------------------------------------------------------------------------------------------------------------------------------------------------------------------------------------------------------------------------------------------------------------------------------------------------------------------------------------------------------------------------------------------------------------------------------------------------------------------------------------------------------------------------------------------------------------------------|------------------------------------------------------------------------------------------------------------------------------------------------------------------------------------------------------------------------------------------------------------------------------------------------------------------------------------------------------------------------------------------------------------------------------------------------------------------------------------------------------------------------------------------------------------------------------------------------------------------------------------------------------------------------------------------------------------------------------------------------------------------------------------------------------------------------------------------------------------------------|
|        | <i>putida</i> , <i>Pseudomonas stutzeri</i> , <i>Pseudomonas syringae</i> , <i>Pseudomonas thivervalensis</i> , <i>Ralstonia</i> sp., <i>Serratia</i> sp., <i>Serratia mercenscens</i> , <i>Serratia proteamaculans</i> , <i>Sphingobacterium</i> sp., <i>Sphingomonas</i> sp., <i>Trichoderma atroviride</i> , <i>Trichoderma harzianum</i> , <i>Trichoderma virens</i>                                                                                                                                                                                                                                                                                                                                                                                                                                                                                                                                                                                                                                                                                                                                                                                                                                                                                                                                                                                                                                                                                                                                                                                 |                                                                                                                                                                                                                                                                                                                                                                                                                                                                                                                                                                                                                                                                                                                                                                                                                                                                        |
| POTATO | <i>Achromobacter xylosoxidans</i> , <i>Actinobacter</i> sp., <i>Agrobacterium</i> sp., <i>Azotobacter</i> sp., <i>Azospirillum</i> sp., <i>Bacillus</i> sp., <i>Bacillus cereus</i> , <i>Bacillus firmus</i> , <i>Bacillus pumilus</i> , <i>Bacillus subtilis</i> , <i>Brevibacillus laterosporus</i> , <i>Enterobacter</i> sp., <i>Methylobacterium</i> sp., <i>Paenibacillus dendritiformis</i> , <i>Paenibacillus marcerans</i> , <i>Pseudomonas</i> sp., <i>Pseudomonas fluorescens</i> , <i>Pseudomonas koreensis</i> , <i>Pseudomonas oryzae</i> , <i>Rhizobium</i> sp., <i>Rhizophagus irregularis</i> , <i>Serratia marcescens</i> , <i>Trichoderma harzianum</i> , <i>Variovorax paradoxus</i>                                                                                                                                                                                                                                                                                                                                                                                                                                                                                                                                                                                                                                                                                                                                                                                                                                                  | Pochar™ (Italy-Microspore/ <i>Pochonia chlamydosporia</i> + <i>Arthrobotis oligospora</i> + <i>Glomus</i> sp.+ <i>Bacillus</i> spp./biocontrol)<br>EM (China/effective microorganism mixture/PGP)<br>KLEPS-Ko (Ukraine/ <i>Paenibacillus</i> sp., <i>Klebsiella oxytoca</i> , <i>Pantoea agglomerans</i> , three <i>Pseudomonas</i> strains and <i>Stenotrophomonas maltophilia</i> /PGP)                                                                                                                                                                                                                                                                                                                                                                                                                                                                              |
| WHEAT  | <i>Aeromonas</i> sp., <i>Alcaligenes</i> sp., <i>Arthrobacter</i> sp., <i>Azospirillum brasilense</i> , <i>Azotobacter chroococcum</i> , <i>Azotobacter vinelandii</i> , <i>Brevibacterium halotolerans</i> , <i>Bacillus</i> sp., <i>Bacillus cereus</i> , <i>Bacillus subtilis</i> , <i>Bacillus insolitus</i> , <i>Bacillus pumilus</i> , <i>Bacillus megaterium</i> , <i>Bacillus safensis</i> , <i>Bacillus thuringiensis</i> , <i>Brevundimonas</i> sp., <i>Microbispora</i> sp., <i>Micromonospora</i> sp., <i>Micromonospora aurantiaca</i> , <i>Mycobacterium</i> sp., <i>Mycobacterium phlei</i> , <i>Mycoplana bullata</i> , <i>Nocardioideus albus</i> , <i>Nocardioideus lucentensis</i> , <i>Ochrobactrum pseudogregnonense</i> , <i>Pantoea</i> sp., <i>Pantoea agglomerans</i> , <i>Paenibacillus</i> sp., <i>Paenibacillus polymyxa</i> , <i>Penicillium bilaii</i> , <i>Penicillium roqueforti</i> , <i>Piriformospora indica</i> , <i>Providencia</i> sp., <i>Pseudomonas aurantiaca</i> , <i>Pseudomonas aeruginosa</i> , <i>Pseudomonas chlororaphis</i> , <i>Pseudomonas extremorientalis</i> , <i>Pseudomonas fluorescens</i> , <i>Pseudomonas putida</i> , <i>Rhodococcus rhodochrous</i> , <i>Serratia marcescens</i> , <i>Stenotrophomonas maltophilia</i> , <i>Streptomyces</i> sp., <i>Streptomyces carpinensis</i> , <i>Streptomyces cellulosa</i> , <i>Streptomyces cheonanensis</i> , <i>Streptomyces coelicolor</i> , <i>Streptomyces geysiriensis</i> , <i>Streptomyces griseus</i> , <i>Streptomyces lomondensis</i> , | Macrogen (South Korea/ <i>Brevibacterium halotolerans</i> FAB3/PGP)<br>RIZOFLO Liquid (Argentina/ <i>Azospirillum brasilense</i> Az1/PGP)<br>NoctinAZO (Argentina/ <i>Azospirillum brasilense</i> Az2/PGP)<br>RIZOFOSliq (Argentina/ <i>Pseudomonas fluorescens</i> Pf/PGP)<br>Trianum-P (Netherlands/ <i>Trichoderma harzianum</i> T22/PGP)<br>Proradix (Germany/ <i>Pseudomonas</i> sp. DSMZ 13134/PGP)<br>RhizoVital 42 (Germany/ <i>Bacillus amyloliquefaciens</i> ssp. <i>plantarum</i> FZB42/PGP)<br>Bio-DC (Germany / <i>Penicillium</i> sp./PGP)<br>BactoProf (Germany/ <i>Trichoderma harzianum</i> and five species of <i>Bacillus</i> /PGP)<br>Trichodermin B (Islamic Republic of Iran-Talhigh Daneh Company/ <i>Trichoderma harzianum</i> /biocontrol)<br>Subtilin (Islamic Republic of Iran-Talhigh Daneh Company/ <i>Bacillus subtilis</i> /biocontrol) |

---

*Streptomyces olivaceus*, *Streptomyces rochei*,  
*Streptomyces thermolilacinus*, *Streptomyces*  
*tricolor*, *Streptomyces werraensis*, *Trichoderma*  
*brevicompactum*, *Trichoderma longibrachiatum*,  
*Trichoderma koningii*, *Trichoderma koningiopsis*,  
*Trichoderma virens*, *Trichoderma viridescens*

---

64

65

**Table S6.** Carriers and delivery methods for agricultural application of PGPM.

66

| Carrier and/or delivery methods                                              | Recorded applications                                                          | Advantages                                                                                                                | Disadvantages                                                                                                             | Selected references |
|------------------------------------------------------------------------------|--------------------------------------------------------------------------------|---------------------------------------------------------------------------------------------------------------------------|---------------------------------------------------------------------------------------------------------------------------|---------------------|
| Alginate encapsulation, alone or with perlite, carrageenan or other polymers | <i>Azotobacter</i><br><i>Pseudomonas</i><br><i>Rhizobia</i><br>Fungi           | High stability along time<br>Slow release of bacteria<br>Protection from stress                                           | Expensive<br>The loss of the compound during preparation<br>Requires additional compounds                                 | [1]–[3]             |
| Char or coal <sup>a</sup>                                                    | <i>Pseudomonas</i> (for remediation)<br><i>Azospirillum</i><br><i>Bacillus</i> | Immobilizes bacteria<br>Environmentally friendly<br>Supports biofilm growth<br>Improves soil properties<br>Not degradable | Not standardised, Needs characterisation<br>Possible release of phytotoxic compounds<br>Requires evaluation of pore sizes | [2],[4]–[9]         |
| Chitosan                                                                     | Mainly delivery of chemicals<br><i>Pseudomonas</i><br><i>Azospirillum</i>      | Elicits resistance against pathogens<br>Suitable for spraying<br>Suitable for encapsulation, with starch                  | Antimicrobial activity                                                                                                    | [10]–[12]           |
| Compost, vermicompost<br>Recent, nano-compost                                | Many different microbial species                                               | Traditional<br>Familiarity<br>Provides additional benefits                                                                | Might interfere with nutrient balance<br>Unstable in time                                                                 | [13],[14]           |
| Inert materials: clay, zeolite, bentonite, montmorillonite                   | <i>Azotobacter</i>                                                             | Inexpensive                                                                                                               | None reported                                                                                                             | [1],[2]             |
| Nanoparticles, nanotubes                                                     | Mainly encapsulation of chemicals<br>Nano-Ag Answer®                           | Precision delivery system                                                                                                 | Potential for toxicity to humans<br>Difficulty in preparation                                                             | [15],[16]           |
| Peat moss                                                                    | <i>Azotobacter</i><br><i>Rhizobia</i> (common method)<br><i>Mycorrhizae</i>    | Stability along time<br>Easiness of preparation<br>Familiarity<br>Water-holding capacity                                  | Scarce availability<br>Not standardised<br>High environmental impact<br>Difficult to sterilise<br>Low pH                  | [1],[2],[17],[18]   |
| Perlite <sup>b</sup>                                                         | <i>Rhizobium</i><br><i>Bacillus</i>                                            | Stability along time                                                                                                      | None reported                                                                                                             | [17]                |

|                          |                                                    |                                                                              |                             |              |
|--------------------------|----------------------------------------------------|------------------------------------------------------------------------------|-----------------------------|--------------|
| Talc                     | <i>Pseudomonas, Rhizobia</i><br><i>Trichoderma</i> | Inert<br>Available<br>Suitable for spraying                                  | None reported               | [2],[18]     |
| Vermiculite <sup>c</sup> | <i>Azotobacter</i><br><i>Pseudomonas</i>           | Can be sterilised<br>easily<br>Provides niches<br>Available<br>Non expensive | Large volume for<br>packing | [1],[2],[18] |

<sup>a</sup> Biochar has been successfully employed to deliver PGPMs, being used as a carrier material for microbial inoculants, applied as seed-coatings. Biochar is used as soil amendment as it improves several soil properties, and thanks to its porous structure, it offers a protective environment for the delivery of microbes of interest. It is also allowed in the EU as amendment in organic agriculture and can therefore be applied widely in field conditions [4],[19]–[25].

<sup>b</sup> Perlite is a volcanic rock composed of a little-hydrated aluminium silicate, easy to sterilize without producing toxic compounds and has been employed as a carrier [2],[18].

<sup>c</sup> Vermiculite is a naturally occurring layer silicate mineral easy to sterilize, widely available and not expensive. It maintains a good moisture, has a pH approximately neutral and good buffering capacities, it has plant growth promotion capacity and has been successfully used to deliver microbes to the rhizosphere [17],[26].

**Table S7.** Radial growth of *T. harzianum* TH01 growth at 24 h, 48 h, and 72 h cultivated on water agar (WA) plates supplemented with increasing concentrations of bioactive compounds BS1, BS2 and BS3. As control, *T. harzianum* TH01 was grown on potato dextrose agar (PDA) and WA plates.

| Bioactive compounds | Treatments         | 24 h                  | 48 h                  | 72 h                  |
|---------------------|--------------------|-----------------------|-----------------------|-----------------------|
| BS1                 | WA                 | 1.57 ± 0.06 <b>gh</b> | 4.67 ± 0.31 <b>de</b> | 6.97 ± 0.23 <b>c</b>  |
|                     | WA + BS 10 ppm     | 1.57 ± 0.12 <b>gh</b> | 5.03 ± 0.06 <b>de</b> | 7.47 ± 0.15 <b>bc</b> |
|                     | WA + BS 100 ppm    | 1.13 ± 0.06 <b>gh</b> | 3.60 ± 0.26 <b>f</b>  | 7.47 ± 0.06 <b>bc</b> |
|                     | WA + BS 1,000 ppm  | 1.83 ± 0.15 <b>g</b>  | 5.30 ± 0.26 <b>d</b>  | 7.93 ± 0.21 <b>b</b>  |
|                     | WA + BS 10,000 ppm | 0.97 ± 0.15 <b>h</b>  | 2.97 ± 0.81 <b>f</b>  | 4.37 ± 1.50 <b>e</b>  |
|                     | PDA                | 3.13 ± 0.21 <b>f</b>  | 7.30 ± 0.60 <b>bc</b> | 9.00 ± 0.00 <b>a</b>  |
| BS2                 | WA                 | 2.43 ± 0.12 <b>l</b>  | 4.23 ± 0.25 <b>h</b>  | 7.00 ± 0.00 <b>d</b>  |
|                     | WA + BS 10 ppm     | 2.83 ± 0.29 <b>k</b>  | 4.90 ± 0.10 <b>g</b>  | 7.50 ± 0.00 <b>c</b>  |
|                     | WA + BS 100 ppm    | 3.17 ± 0.15 <b>j</b>  | 5.00 ± 0.00 <b>g</b>  | 8.00 ± 0.00 <b>b</b>  |
|                     | WA + BS 1,000 ppm  | 3.67 ± 0.29 <b>i</b>  | 5.83 ± 0.29 <b>f</b>  | 7.83 ± 0.29 <b>b</b>  |
|                     | WA + BS 10,000 ppm | 3.53 ± 0.06 <b>i</b>  | 6.33 ± 0.29 <b>e</b>  | 9.00 ± 0.00 <b>a</b>  |
|                     | PDA                | 4.03 ± 0.06 <b>h</b>  | 7.03 ± 0.06 <b>d</b>  | 9.00 ± 0.00 <b>a</b>  |
| BS3                 | WA                 | 1.17 ± 0.06 <b>d</b>  | 4.03 ± 0.15 <b>c</b>  | 6.73 ± 0.06 <b>b</b>  |
|                     | WA + BS 10 ppm     | 1.03 ± 0.06 <b>d</b>  | 4.13 ± 0.23 <b>c</b>  | 8.53 ± 0.15 <b>a</b>  |
|                     | WA + BS 100 ppm    | 1.13 ± 0.06 <b>d</b>  | 4.53 ± 0.06 <b>c</b>  | 8.80 ± 0.10 <b>a</b>  |
|                     | WA + BS 1,000 ppm  | 0.90 ± 0.10 <b>d</b>  | 4.30 ± 0.10 <b>c</b>  | 8.67 ± 0.12 <b>a</b>  |
|                     | WA + BS 10,000 ppm | 1.33 ± 0.15 <b>d</b>  | 5.27 ± 0.25 <b>b</b>  | 8.40 ± 0.10 <b>a</b>  |
|                     | PDA                | 4.03 ± 0.06 <b>h</b>  | 7.03 ± 0.06 <b>d</b>  | 9.00 ± 0.00 <b>a</b>  |



---

|     |                          |                          |                          |
|-----|--------------------------|--------------------------|--------------------------|
| PDA | $1.20 \pm 0.00$ <b>d</b> | $4.43 \pm 0.21$ <b>c</b> | $8.90 \pm 0.10$ <b>a</b> |
|-----|--------------------------|--------------------------|--------------------------|

---

Values represent the average radial growth (cm) of three replicates  $\pm$  standard deviation for each treatment. A two-way repeated measures ANOVA with Student-Newman-Keuls (SNK) test was performed for data comparison. Different letters indicate significant differences between treatments ( $p < 0.05$ ).

82  
83  
84  
85  
86  
87  
88

**Table S8.** Analysis of variance for the radial growth of *T. harzianum* TH01 in presence of different bioactive compounds (BS1, BS2, and BS3) and in the course of time (T with T1:24 h, T2:48 h, and T3:72 h).

| Bioactive compounds | Treatment               | Df | Sum Sq | Mean Sq | F value | Pr (>F)      |
|---------------------|-------------------------|----|--------|---------|---------|--------------|
| BS1                 | Time of measurement (T) | 2  | 10.843 | 5.421   | 44.090  | 1.16e-07 *** |
|                     | Biostimulants (B)       | 5  | 2.792  | 0.558   | 4.541   | 0.00746 **   |
|                     | T x B                   | 10 | 1.373  | 0.137   | 1.117   | 0.40155      |
|                     | Residuals               | 18 | 2.213  | 0.123   |         |              |
| BS2                 | Time of measurement (T) | 2  | 6.577  | 3.288   | 167.52  | 2.33e-12 *** |
|                     | Biostimulants (B)       | 5  | 1.169  | 0.234   | 11.91   | 3.40e-05 *** |
|                     | T x B                   | 10 | 0.506  | 0.051   | 2.58    | 0.0385 *     |
|                     | Residuals               | 18 | 0.353  | 0.020   |         |              |
| BS3                 | Time of measurement (T) | 2  | 11.203 | 5.601   | 57.125  | 1.6e-08 ***  |
|                     | Biostimulants (B)       | 5  | 2.610  | 0.522   | 5.324   | 0.00355 **   |
|                     | T x B                   | 10 | 4.853  | 0.485   | 4.949   | 0.00164 **   |
|                     | Residuals               | 18 | 1.765  | 0.098   |         |              |

\*, \*\*, \*\*\*, significant at  $p < 0.05$ ,  $0.01$ , and  $0.001$ , respectively. The absence of asterisks indicates non-significant effects.

## REFERENCES:

- Abd El-Fattah, D. A.; Eweda, W. E.; Zayed, M. S.; Hassanein, M. K. Effect of Carrier Materials, Sterilization Method, and Storage Temperature on Survival and Biological Activities of *Azotobacter Chroococcum* Inoculant. *Ann. Agric. Sci.* **2013**, *58*(2), 111-118. <https://doi.org/10.1016/j.aoas.2013.07.001>.
- Singh, D. P.; Singh, H. B.; Prabha, R. *Microbial Inoculants in Sustainable Agricultural Productivity: Vol. 2: Functional Applications*; Springer: India; **2016**. <https://doi.org/10.1007/978-81-322-2644-4>.
- Liffourrena, A. S.; Lucchesi, G. I. Alginate-Perlite Encapsulated *Pseudomonas Putida* A (ATCC 12633) Cells: Preparation, Characterization and Potential Use as Plant Inoculants. *J. Biotechnol.* **2018**, *278*, 28-33. <https://doi.org/10.1016/j.jbiotec.2018.04.019>.
- Chen, B.; Yuan, M.; Qian, L. Enhanced Bioremediation of PAH-Contaminated Soil by Immobilized Bacteria with Plant Residue and Biochar as Carriers. *J. Soils Sediments* **2012**, *12*, 1350-1359. <https://doi.org/10.1007/s11368-012-0554-5>.
- Quilliam, R. S.; Glanville, H. C.; Wade, S. C.; Jones, D. L. Life in the "charosphere" - Does Biochar in Agricultural Soil Provide a Significant Habitat for Microorganisms? *Soil Biol. Biochem.* **2013**, *65*, 287-293. <https://doi.org/10.1016/j.soilbio.2013.06.004>.
- Glodowska, M. *Biochar as a Potential Inoculant Carrier for Plant-Beneficial Bacteria*; LAP Lambert Academic Publishing, **2005**. ISBN: 978-3-659-32047-7.
- Sun, D.; Meng, J.; Liang, H.; Yang, E.; Huang, Y.; Chen, W.; Jiang, L.; Lan, Y.; Zhang, W.; Gao, J. Effect of Volatile Organic Compounds Absorbed to Fresh Biochar on Survival of *Bacillus Mucilaginosus* and Structure of Soil Microbial Communities. *J. Soils Sediments* **2015**, *15*, 271-281. <https://doi.org/10.1007/s11368-014-0996-z>.
- Zhou, H.; Zhang, D.; Wang, P.; Liu, X.; Cheng, K.; Li, L.; Zheng, J.; Zhang, X.; Zheng, J.; Crowley, D.; van Zwieten, L.; Pan, G. Changes in Microbial Biomass and the Metabolic Quotient with Biochar Addition to Agricultural Soils: A Meta-Analysis. *Agric. Ecosyst. Environ.* **2017**, *239*, 80-89.

- <https://doi.org/10.1016/j.agee.2017.01.006>. 117
9. Hill, R. A.; Hunt, J.; Sanders, E.; Tran, M.; Burk, G. A.; Mlsna, T. E.; Fitzkee, N. C. Effect of Biochar on Microbial Growth: A Metabolomics and Bacteriological Investigation in *E. Coli*. *Environ. Sci. Technol.* **2019**, *239*, 80–89. <https://doi.org/10.1021/acs.est.8b05024>. 118–120
  10. Kashyap, P. L.; Xiang, X.; Heiden, P. Chitosan Nanoparticle Based Delivery Systems for Sustainable Agriculture. *Int. J. Biol. Macromol.* **2015**, *77*, 36–51. <https://doi.org/10.1016/j.ijbiomac.2015.02.039>. 121–122
  11. Kumaraswamy, R. V.; Kumari, S.; Choudhary, R. C.; Pal, A.; Raliya, R.; Biswas, P.; Saharan, V. Engineered Chitosan Based Nanomaterials: Bioactivities, Mechanisms and Perspectives in Plant Protection and Growth. *Int. J. Biol. Macromol.* **2018**, *113*, 494–506. <https://doi.org/10.1016/j.ijbiomac.2018.02.130>. 123–125
  12. Perez, J. J.; Francois, N. J.; Maroniche, G. A.; Borrajo, M. P.; Pereyra, M. A.; Creus, C. M. A Novel, Green, Low-Cost Chitosan-Starch Hydrogel as Potential Delivery System for Plant Growth-Promoting Bacteria. *Carbohydr. Polym.* **2018**, *202*, 409–417. <https://doi.org/10.1016/j.carbpol.2018.07.084>. 126–128
  13. Nuti, M.; Giovannetti, G. Borderline Products between Bio-Fertilizers/Bio-Effectors and Plant Protectants: The Role of Microbial Consortia. *J. Agric Sci Technol A* **2015**, *5*, 305–315. <https://doi.org/10.17265/2161-6256/2015.05.001>. 129–131
  14. Duo, L. A.; Liu, C. X.; Zhao, S. L. Alleviation of Drought Stress in Turfgrass by the Combined Application of Nano-Compost and Microbes from Compost. *Russ. J. Plant Physiol.* **2018**, *65*, 419–426. <https://doi.org/10.1134/S102144371803010X>. 132–134
  15. Jampilek, J.; Králová, K. Nanomaterials for Delivery of Nutrients and Growth-Promoting Compounds to Plants. In *Nanotechnology: An Agricultural Paradigm*; Springer: Singapore; **2017**. [https://doi.org/10.1007/978-981-10-4573-8\\_9](https://doi.org/10.1007/978-981-10-4573-8_9). 135–137
  16. Prasad, R.; Bhattacharyya, A.; Nguyen, Q. D. Nanotechnology in Sustainable Agriculture: Recent Developments, Challenges, and Perspectives. *Front. Microbiol.* **2017**, *8*, 1014. <https://doi.org/10.3389/fmicb.2017.01014>. 138–140
  17. Daza, A.; Santamaría, C.; Rodríguez-Navarro, D. N.; Camacho, M.; Orive, R.; Temprano, F. Perlite as a Carrier for Bacterial Inoculants. *Soil Biol. Biochem.* **2000**, *32*(4), 567–572. [https://doi.org/10.1016/S0038-0717\(99\)00185-6](https://doi.org/10.1016/S0038-0717(99)00185-6). 141–142
  18. Nehra, V.; Choudhary, M. A Review on Plant Growth Promoting Rhizobacteria Acting as Bioinoculants and Their Biological Approach towards the Production of Sustainable Agriculture. *J. Appl. Nat. Sci.* **2015**, *7*(1), 540–556. <https://doi.org/10.31018/jans.v7i1.642>. 143–145
  19. Backer, R.; Rokem, J. S.; Ilangumaran, G.; Lamont, J.; Praslickova, D.; Ricci, E.; Subramanian, S.; Smith, D. L. Plant Growth-Promoting Rhizobacteria: Context, Mechanisms of Action, and Roadmap to Commercialization of Biostimulants for Sustainable Agriculture. *Front. Plant Sci.* **2018**, *9*, 1473. <https://doi.org/10.3389/fpls.2018.01473>. 146–149
  20. Ding, Y.; Liu, Y.; Liu, S.; Li, Z.; Tan, X.; Huang, X.; Zeng, G.; Zhou, L.; Zheng, B. Biochar to Improve Soil Fertility. A Review. *Agron. Sustain. Dev.* **2016**, *36*, 36. <https://doi.org/10.1007/s13593-016-0372-z>. 150–151
  21. Latini, A.; Bacci, G.; Teodoro, M.; Gattia, D. M.; Bevivino, A.; Trakal, L. The Impact of Soil-Applied Biochars From Different Vegetal Feedstocks on Durum Wheat Plant Performance and Rhizospheric Bacterial Microbiota in Low Metal-Contaminated Soil. *Front. Microbiol.* **2019**, *10*, 2694. <https://doi.org/10.3389/fmicb.2019.02694>. 152–154
  22. Lehmann, J.; Rillig, M. C.; Thies, J.; Masiello, C. A.; Hockaday, W. C.; Crowley, D. Biochar Effects on Soil Biota - A Review. *Soil Biol. Biochem.* **2011**, *43*(9), 1812–1836. <https://doi.org/10.1016/j.soilbio.2011.04.022>. 155–156
  23. Egamberdieva, D.; Wirth, S.; Behrendt, U.; Abd-Allah, E. F.; Berg, G. Biochar Treatment Resulted in a Combined Effect on Soybean Growth Promotion and a Shift in Plant Growth Promoting Rhizobacteria. *Front.* 157–158

- Microbiol.* **2016**, *7*, 209. <https://doi.org/10.3389/fmicb.2016.00209>. 159
24. Muter, O.; Grantina-Ievina, L.; Makarenkova, G.; Vecstaudza, D.; Strikauska, S.; Selga, T.; Ksparinskis, R; 160  
Stelmahere, S.; Steiner, C. Effect of Biochar and Trichoderma Application on Fungal Diversity and Growth of 161  
Zea Mays in a Sandy Loam Soil. *Environ. Exp. Biol.* **2017**, *15*: 289-296. <https://doi.org/10.22364/eeb.15.30>. 162
25. Ribera, J.; Gandía, M.; Marcos, J. F.; Bas, M. D. C.; Fink, S.; Schwarze, F. W. M. R. Effect of Trichoderma- 163  
Enriched Organic Charcoal in the Integrated Wood Protection Strategy. *PLoS One* **2017**, *12*(8), e0183004. 164  
<https://doi.org/10.1371/journal.pone.0183004>. 165
26. Malusá, E.; Sas-Paszt, L.; Ciesielska, J. Technologies for Beneficial Microorganisms Inocula Used as 166  
Biofertilizers. *Scientific World Journal.* **2012**, *2012*: 491206. <https://doi.org/10.1100/2012/491206>. 167
- 168  
169  
170  
171  
172
